# Supplementary material
Source: PubMed Central journal article supplement (PMC3702677)
Supplement: NIHMS483329-supplement-1.pdf [file NIHMS483329-supplement-1.pdf]

# S-Fig.1

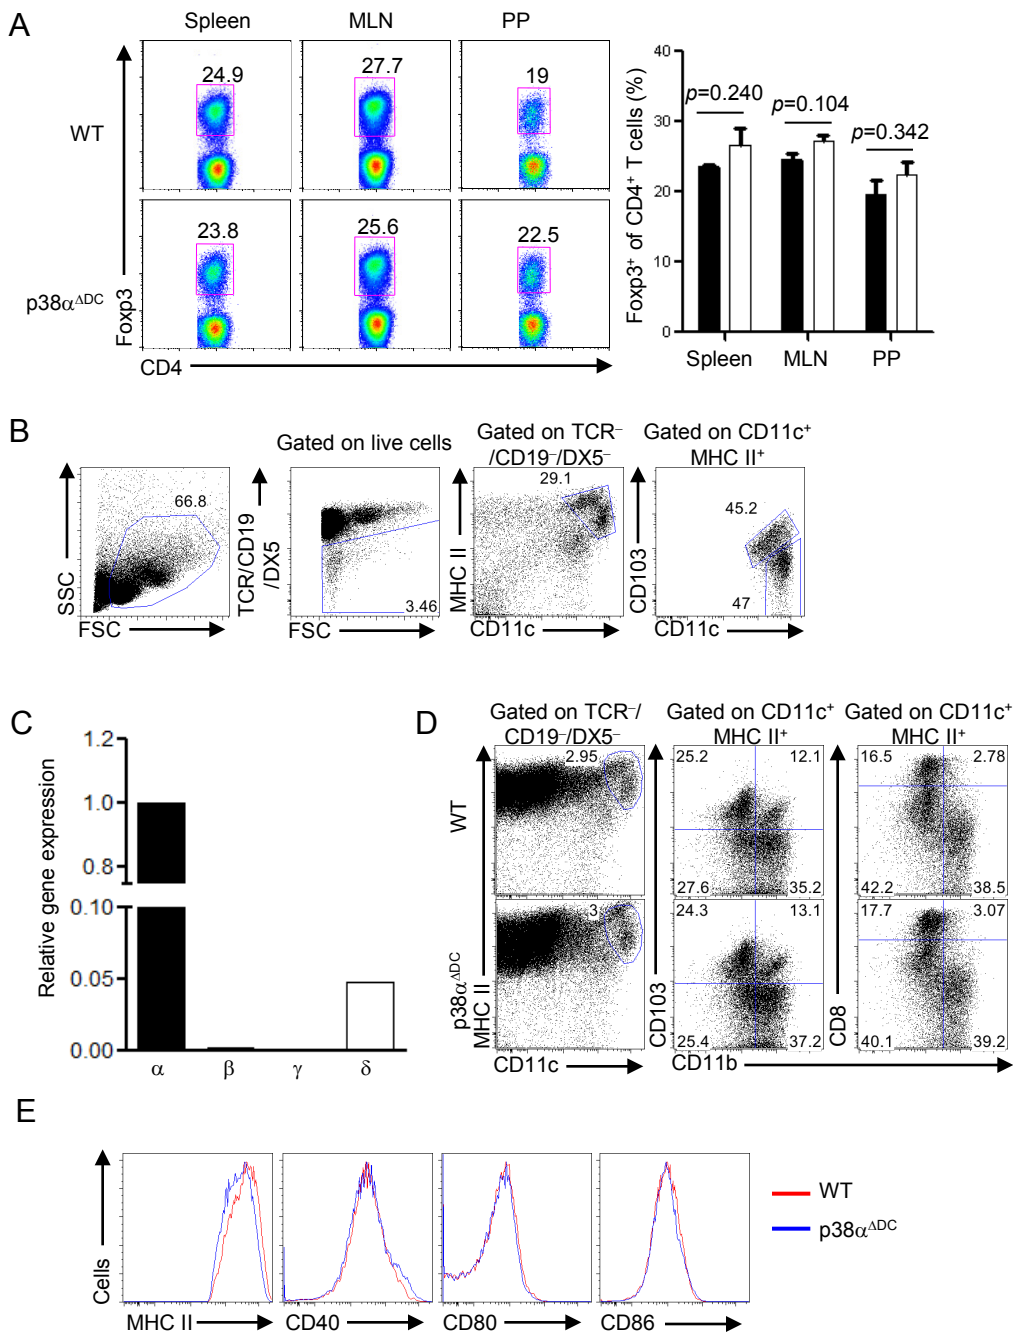

## Supplementary Figure 1. Expression and deletion of p38 $\alpha$ in mucosal DCs. (A)

Expression of Foxp3 and proportion of Foxp3<sup>+</sup> Treg cells among CD4<sup>+</sup> T cells in the spleen, MLN and Peyer's patches (PP) of WT and p38 $\alpha^{ADC}$  mice. (B) Sorting strategy of CD103<sup>+</sup> and CD103<sup>-</sup> MLN DCs. (C) RNA analysis of p38 $\alpha$ , p38 $\beta$ , p38 $\gamma$  and p38 $\delta$  in CD103<sup>+</sup> MLN DCs. (D) Analysis of MLN DC subsets in WT and p38 $\alpha^{ADC}$  mice. (E) Analysis of MLN DC maturation markers in WT and p38 $\alpha^{ADC}$  mice. Data are representative of 2-3 independent experiments (n=3-4 mice per group). Error bars indicate S.E.M.

## S-Fig. 2

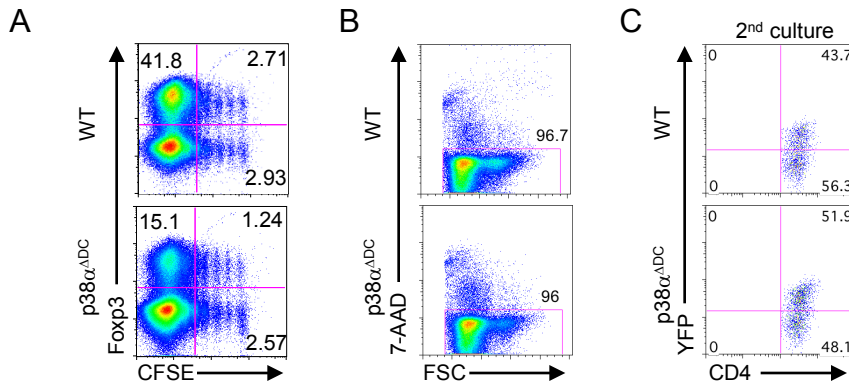

**Supplementary Figure 2. Effects of p38 $\alpha$  deletion on mucosal DC-mediated T cell responses.** (A) Expression of Foxp3 in CFSE-labeled T cells activated by WT or p38 $\alpha$ -deficient CD103<sup>+</sup> MLN DCs for 5 days. (B) Analysis of viability (7-AAD<sup>-</sup>) in T cells activated with WT or p38 $\alpha$ -deficient CD103<sup>+</sup> MLN DCs for 5 days. (C) Naïve T cells from Foxp3<sup>YFP-Cre</sup> mice were activated with WT CD103<sup>+</sup> DCs for 4 days, and then sorted YFP<sup>+</sup> cells were re-stimulated with WT or p38 $\alpha$ -deficient CD103<sup>+</sup> DCs in the second-round culture for 4 days, before analysis of Foxp3-YFP expression. Data are representative of 2 independent experiments (n=3 mice per group).

### S-Fig. 3

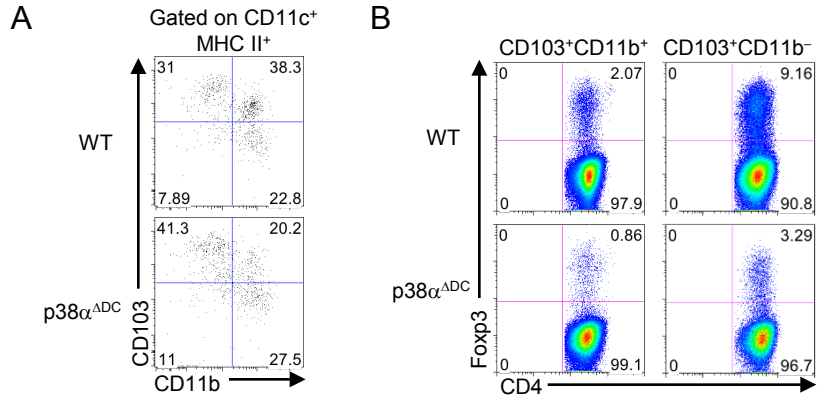

### Supplementary Figure 3. Effect of p38 $\alpha$ deletion on lamina propria (LP) CD103<sup>+</sup>CD11b<sup>+</sup> and CD103<sup>+</sup>CD11b<sup>-</sup> DC functions.

**(A)** Analysis of intestinal LP DC subsets in WT and p38 $\alpha$ <sup>ADC</sup> mice.

**(B)** Expression of Foxp3 in OT-II T cells activated by WT or p38 $\alpha$ -deficient CD103<sup>+</sup>CD11b<sup>+</sup> or CD103<sup>+</sup>CD11b<sup>-</sup> LP DCs, in the presence of OVA (0.05  $\mu$ g/ml), for 5 days. Data are representative of 2 independent experiments (n=3 mice per group).
